# Supplementary material for: Study filters for non-randomized studies of interventions consistently lacked sensitivity upon external validation
Source: Springer Nature journal article supplement (doi:10.1186/s12874-018-0625-4), 2018-12-01
Supplement: MOESM1 [file 16350316]

**PubMed search strategy for identifying Cochrane reviews with NRS**

| Search | Query                                                                                                                | Hits        |
|--------|----------------------------------------------------------------------------------------------------------------------|-------------|
| #1     | (non random*[tiab] OR nonrandom*[tiab] OR NRS[tiab] OR NRSs[tiab]) AND Cochrane Database Syst Rev[ta]                | 481         |
| #2     | follow up stud*[tiab] AND Cochrane Database Syst Rev[ta]                                                             | 31          |
| #3     | epidemiolog*[tiab] AND Cochrane Database Syst Rev[ta]                                                                | 94          |
| #4     | observational[tiab] AND Cochrane Database Syst Rev[ta]                                                               | 404         |
| #5     | ecologic*[tiab] AND Cochrane Database Syst Rev[ta]                                                                   | 7           |
| #6     | longitudinal[tiab] AND Cochrane Database Syst Rev[ta]                                                                | 21          |
| #7     | ("case series"[tiab] OR case report*[tiab]) AND Cochrane Database Syst Rev[ta]                                       | 169         |
| #8     | ("interrupted time series"[tiab] OR "interrupted times series"[tiab]) AND Cochrane Database Syst Rev[ta]             | 257         |
| #9     | ("before after"[tiab] OR "before and after"[tiab] OR "CBA"[tiab] OR "CBAs"[tiab]) AND Cochrane Database Syst Rev[ta] | 347         |
| #10    | cross sectional*[tiab] AND Cochrane Database Syst Rev[ta]                                                            | 45          |
| #11    | case control*[tiab] AND Cochrane Database Syst Rev[ta]                                                               | 132         |
| #12    | cohort[tiab] AND Cochrane Database Syst Rev[ta]                                                                      | 280         |
| #13    | <b>#1 OR #2 OR #3 OR #4 OR #5 OR #6 OR #7 OR #8 OR #9 OR #10 OR #11 OR #12</b>                                       | <b>1522</b> |

The search was conducted in PubMed on 20.10.2016
