# Supplementary material for: Study filters for non-randomized studies of interventions consistently lacked sensitivity upon external validation
Source: Springer Nature journal article supplement (doi:10.1186/s12874-018-0625-4), 2018-12-01
Supplement: MOESM2 [file 16350316]

**Classification of the intervention investigated in the Cochrane review, following Polus et al.**

**[1]**

| <b>Type of intervention</b>            |
|----------------------------------------|
| Behavioural / educational intervention |
| Clinical intervention                  |
| Pharmaceutical intervention            |
| Environmental intervention             |
| Occupational intervention              |
| Health policy intervention             |
| Health systems intervention            |
| Nutrition intervention                 |
| Screening intervention                 |
| Vaccination intervention               |

| <b>Level of intervention</b> |
|------------------------------|
| Individual                   |
| Organisational/group         |
| Large scale/population       |

## Performance measures (following Jenkins [2])

|               |               | Relevant<br>(test set) | Not relevant |
|---------------|---------------|------------------------|--------------|
| Search filter | Retrieved     | a                      | b            |
|               | Not retrieved | <u>c</u>               | <u>d</u>     |
|               |               | a + c                  | b + d        |

Sensitivity =  $a/(a+c)$ ; Specificity =  $d/(b+d)$

## Reference list

1. Polus S, Pieper D, Burns J, Fretheim A, Ramsay C, Higgins JPT, Mathes T, Pfadenhauer LM, Rehfues EA: **Heterogeneity in application, design, and analysis characteristics was found for controlled before-after and interrupted time series studies included in Cochrane reviews.** *J Clin Epidemiol* 2017, **91**:56-69.
2. Jenkins M: **Evaluation of methodological search filters: a review.** *Health Info Libr J* 2004, **21**(3):148-163.
