# Supplementary material for: Study filters for non-randomized studies of interventions consistently lacked sensitivity upon external validation
Source: Springer Nature journal article supplement (doi:10.1186/s12874-018-0625-4), 2018-12-01
Supplement: MOESM4 [file 16350316]

**Number of reviews and studies per Cochrane group in the reference set**

| <b>Cochrane group</b>                                   | <b>Number of CRs</b> | <b>Number of studies</b> |
|---------------------------------------------------------|----------------------|--------------------------|
| Effective Practice and Organisation of Care Group       | 58                   | 874                      |
| HIV/AIDS Group                                          | 26                   | 339                      |
| Injuries Group                                          | 24                   | 482                      |
| Gynaecological, Neuro-oncology and Orphan Cancer Group  | 20                   | 321                      |
| Public Health Group                                     | 14                   | 297                      |
| Work Group                                              | 10                   | 205                      |
| Colorectal Cancer Group                                 | 9                    | 183                      |
| Fertility Regulation Group                              | 9                    | 123                      |
| Musculoskeletal Group                                   | 8                    | 158                      |
| Pain, Palliative and Supportive Care Group              | 8                    | 116                      |
| Tobacco Addiction Group                                 | 8                    | 192                      |
| Acute Respiratory Infections Group                      | 7                    | 153                      |
| Epilepsy Group                                          | 7                    | 75                       |
| Developmental, Psychosocial and Learning Problems Group | 6                    | 111                      |
| Infectious Diseases Group                               | 6                    | 103                      |
| Childhood Cancer Group                                  | 5                    | 99                       |
| Drugs and Alcohol Group                                 | 4                    | 57                       |
| Metabolic and Endocrine Disorders Group                 | 4                    | 52                       |
| Stroke Group                                            | 4                    | 82                       |
| Back and Neck Group                                     | 3                    | 28                       |
| Consumers and Communication Group                       | 3                    | 17                       |
| Hepato-Biliary Group                                    | 3                    | 85                       |
| Oral Health Group                                       | 3                    | 28                       |
| Upper GI and Pancreatic Diseases Group                  | 3                    | 19                       |
| Breast Cancer Group                                     | 2                    | 40                       |
| Movement Disorders Group                                | 2                    | 23                       |
| Airways Group                                           | 1                    | 15                       |
| Anaesthesia, Critical and Emergency Care Group          | 1                    | 5                        |
| Common Mental Disorders Group                           | 1                    | 6                        |
| Dementia and Cognitive Improvement Group                | 1                    | 7                        |
| Eyes and Vision Group                                   | 1                    | 2                        |
| Heart Group                                             | 1                    | 16                       |
| Hypertension Group                                      | 1                    | 20                       |
| IBD Group                                               | 1                    | 3                        |
| Kidney and Transplant Group                             | 1                    | 40                       |
| Multiple Sclerosis and Rare Diseases of the CNS Group   | 1                    | 3                        |
| Pregnancy and Childbirth Group                          | 1                    | 23                       |
| Skin Group                                              | 1                    | 14                       |
| Urology Group                                           | 1                    | 9                        |
| Vascular Group                                          | 1                    | 55                       |
| Wounds Group                                            | 1                    | 2                        |

CR: Cochrane review; GI: Gastrointestinal; IBD: Inflammatory Bowel Disease; CNS: Central Nervous
