# Supplementary material for: Study filters for non-randomized studies of interventions consistently lacked sensitivity upon external validation
Source: Springer Nature journal article supplement (doi:10.1186/s12874-018-0625-4), 2018-12-01
Supplement: MOESM5 [file 16350316]

## Detailed results of the evaluation of study filters

The evaluation with all intervention types took place between 19.-21.06.2017. The evaluation with the subgroup of IQWiG-relevant intervention types (excluding environmental intervention, occupational intervention, health policy intervention, health systems intervention, vaccination intervention) took place between 17.-20.07.2017. Study type: 1: Randomized controlled trial (RCT), 2: Nonrandomized controlled trial, 3: Controlled before-after study, 4: Interrupted time series (with comparison group), 5: Prospective cohort study, 6: Retrospective cohort study, 7: Non-concurrent cohort study, 8: (Nested) case-control study, 9: Cross-sectional study, 10: Non-comparative study (case report or case series), 11: Before-after study, 12: Interrupted time series (without comparison group). The study types targeted by the filter are highlighted in yellow.

| Study filters (developers)                   | All intervention types |               |          |                 |             | Subgroup analysis of specific intervention |          |                 |             |
|----------------------------------------------|------------------------|---------------|----------|-----------------|-------------|--------------------------------------------|----------|-----------------|-------------|
|                                              | Study type tested      | Hits Medline* | Test set | Citations found | Sensitivity | Hits Medline*                              | Test set | Citations found | Sensitivity |
| Case-control studies_1 (University of Texas) | 1                      | 660.864       | 200      | 56              | 0.28        | 666.144                                    | 109      | 23              | 0.21        |
| Case-control studies_1 (University of Texas) | 2                      | 660.864       | 200      | 36              | 0.18        | 666.144                                    | 155      | 20              | 0.13        |
| Case-control studies_1 (University of Texas) | 3                      | 660.864       | 200      | 24              | 0.12        | 666.144                                    | 100      | 7               | 0.07        |
| Case-control studies_1 (University of Texas) | 4                      | 660.864       | 106      | 8               | 0.08        | 666.144                                    | 51       | 0               | 0.00        |
| Case-control studies_1 (University of Texas) | 5                      | 660.864       | 200      | 19              | 0.10        | 666.144                                    | 176      | 18              | 0.10        |
| Case-control studies_1 (University of Texas) | 6                      | 660.864       | 200      | 12              | 0.06        | 666.144                                    | 119      | 10              | 0.08        |
| Case-control studies_1 (University of Texas) | 7                      | 660.864       | 31       | 4               | 0.13        | 666.144                                    | 10       | 2               | 0.20        |
| Case-control studies_1 (University of Texas) | 8                      | 660.864       | 200      | 156             | 0.78        | 666.144                                    | 162      | 126             | 0.78        |
| Case-control studies_1 (University of Texas) | 9                      | 660.864       | 136      | 7               | 0.05        | 666.144                                    | 77       | 6               | 0.08        |
| Case-control studies_1 (University of Texas) | 10                     | 660.864       | 200      | 5               | 0.03        | 666.144                                    | 195      | 5               | 0.03        |
| Case-control studies_1 (University of Texas) | 11                     | 660.864       | 200      | 3               | 0.02        | 666.144                                    | 147      | 3               | 0.02        |
| Case-control studies_1 (University of Texas) | 12                     | 660.864       | 179      | 2               | 0.01        | 666.144                                    | 85       | 1               | 0.01        |
| Case-control studies_2 (University of Texas) | 1                      | 1.284.387     | 200      | 58              | 0.29        | 1.294.799                                  | 109      | 24              | 0.22        |
| Case-control studies_2 (University of Texas) | 2                      | 1.284.387     | 200      | 38              | 0.19        | 1.294.799                                  | 155      | 22              | 0.14        |
| Case-control studies_2 (University of Texas) | 3                      | 1.284.387     | 200      | 30              | 0.15        | 1.294.799                                  | 100      | 8               | 0.08        |
| Case-control studies_2 (University of Texas) | 4                      | 1.284.387     | 106      | 18              | 0.17        | 1.294.799                                  | 51       | 3               | 0.06        |
| Case-control studies_2 (University of Texas) | 5                      | 1.284.387     | 200      | 27              | 0.14        | 1.294.799                                  | 176      | 26              | 0.15        |
| Case-control studies_2 (University of Texas) | 6                      | 1.284.387     | 200      | 87              | 0.44        | 1.294.799                                  | 119      | 56              | 0.47        |
| Case-control studies_2 (University of Texas) | 7                      | 1.284.387     | 31       | 12              | 0.39        | 1.294.799                                  | 10       | 2               | 0.20        |
| Case-control studies_2 (University of Texas) | 8                      | 1.284.387     | 200      | 159             | 0.80        | 1.294.799                                  | 162      | 128             | 0.79        |

| Study filters (developers)                   | All intervention types |               |          |                 |             | Subgroup analysis of specific intervention |          |                 |             |
|----------------------------------------------|------------------------|---------------|----------|-----------------|-------------|--------------------------------------------|----------|-----------------|-------------|
|                                              | Study type tested      | Hits Medline* | Test set | Citations found | Sensitivity | Hits Medline*                              | Test set | Citations found | Sensitivity |
| Case-control studies_2 (University of Texas) | 9                      | 1.284.387     | 136      | 23              | 0.17        | 1.294.799                                  | 77       | 11              | 0.14        |
| Case-control studies_2 (University of Texas) | 10                     | 1.284.387     | 200      | 51              | 0.26        | 1.294.799                                  | 195      | 51              | 0.26        |
| Case-control studies_2 (University of Texas) | 11                     | 1.284.387     | 200      | 11              | 0.06        | 1.294.799                                  | 147      | 9               | 0.06        |
| Case-control studies_2 (University of Texas) | 12                     | 1.284.387     | 179      | 14              | 0.08        | 1.294.799                                  | 85       | 9               | 0.11        |
| Cohort studies (University of Texas)         | 1                      | 2.204.911     | 200      | 39              | 0.20        | 2.221.228                                  | 109      | 24              | 0.22        |
| Cohort studies (University of Texas)         | 2                      | 2.204.911     | 200      | 67              | 0.34        | 2.221.228                                  | 155      | 54              | 0.35        |
| Cohort studies (University of Texas)         | 3                      | 2.204.911     | 200      | 55              | 0.28        | 2.221.228                                  | 100      | 21              | 0.21        |
| Cohort studies (University of Texas)         | 4                      | 2.204.911     | 106      | 32              | 0.30        | 2.221.228                                  | 51       | 13              | 0.25        |
| Cohort studies (University of Texas)         | 5                      | 2.204.911     | 200      | 143             | 0.72        | 2.221.228                                  | 176      | 128             | 0.73        |
| Cohort studies (University of Texas)         | 6                      | 2.204.911     | 200      | 142             | 0.71        | 2.221.228                                  | 119      | 89              | 0.75        |
| Cohort studies (University of Texas)         | 7                      | 2.204.911     | 31       | 16              | 0.52        | 2.221.228                                  | 10       | 4               | 0.40        |
| Cohort studies (University of Texas)         | 8                      | 2.204.911     | 200      | 66              | 0.33        | 2.221.228                                  | 162      | 55              | 0.34        |
| Cohort studies (University of Texas)         | 9                      | 2.204.911     | 136      | 45              | 0.33        | 2.221.228                                  | 77       | 25              | 0.32        |
| Cohort studies (University of Texas)         | 10                     | 2.204.911     | 200      | 106             | 0.53        | 2.221.228                                  | 195      | 106             | 0.54        |
| Cohort studies (University of Texas)         | 11                     | 2.204.911     | 200      | 63              | 0.32        | 2.221.228                                  | 147      | 52              | 0.35        |
| Cohort studies (University of Texas)         | 12                     | 2.204.911     | 179      | 43              | 0.24        | 2.221.228                                  | 85       | 23              | 0.27        |
| Clinical trials (University of Texas)        | 1                      | 1.445.276     | 200      | 182             | 0.91        | 1.454.160                                  | 109      | 102             | 0.94        |
| Clinical trials (University of Texas)        | 2                      | 1.445.276     | 200      | 77              | 0.39        | 1.454.160                                  | 155      | 50              | 0.32        |
| Clinical trials (University of Texas)        | 3                      | 1.445.276     | 200      | 47              | 0.24        | 1.454.160                                  | 100      | 24              | 0.24        |
| Clinical trials (University of Texas)        | 4                      | 1.445.276     | 106      | 8               | 0.08        | 1.454.160                                  | 51       | 3               | 0.06        |
| Clinical trials (University of Texas)        | 5                      | 1.445.276     | 200      | 69              | 0.35        | 1.454.160                                  | 176      | 60              | 0.34        |
| Clinical trials (University of Texas)        | 6                      | 1.445.276     | 200      | 25              | 0.13        | 1.454.160                                  | 119      | 13              | 0.11        |
| Clinical trials (University of Texas)        | 7                      | 1.445.276     | 31       | 10              | 0.32        | 1.454.160                                  | 10       | 5               | 0.50        |
| Clinical trials (University of Texas)        | 8                      | 1.445.276     | 200      | 28              | 0.14        | 1.454.160                                  | 162      | 19              | 0.12        |
| Clinical trials (University of Texas)        | 9                      | 1.445.276     | 136      | 12              | 0.09        | 1.454.160                                  | 77       | 6               | 0.08        |
| Clinical trials (University of Texas)        | 10                     | 1.445.276     | 200      | 39              | 0.20        | 1.454.160                                  | 195      | 39              | 0.20        |
| Clinical trials (University of Texas)        | 11                     | 1.445.276     | 200      | 76              | 0.38        | 1.454.160                                  | 147      | 72              | 0.49        |
| Clinical trials (University of Texas)        | 12                     | 1.445.276     | 179      | 22              | 0.12        | 1.454.160                                  | 85       | 19              | 0.22        |

Study filters for non-randomized studies of interventions consistently lacked sensitivity upon external validation

| Study filters (developers)                | Study type tested | All intervention types |          |                 |             | Subgroup analysis of specific intervention |          |                 |             |
|-------------------------------------------|-------------------|------------------------|----------|-----------------|-------------|--------------------------------------------|----------|-----------------|-------------|
|                                           |                   | Hits Medline*          | Test set | Citations found | Sensitivity | Hits Medline*                              | Test set | Citations found | Sensitivity |
| MEDLINE precision (Fraser 2000)           | 1                 | 9.509.757              | 200      | 166             | 0.83        | 9.565.913                                  | 109      | 92              | 0.84        |
| MEDLINE precision (Fraser 2000)           | 2                 | 9.509.757              | 200      | 168             | 0.84        | 9.565.913                                  | 155      | 129             | 0.83        |
| MEDLINE precision (Fraser 2000)           | 3                 | 9.509.757              | 200      | 178             | 0.89        | 9.565.913                                  | 100      | 87              | 0.87        |
| MEDLINE precision (Fraser 2000)           | 4                 | 9.509.757              | 106      | 91              | 0.86        | 9.565.913                                  | 51       | 42              | 0.82        |
| MEDLINE precision (Fraser 2000)           | 5                 | 9.509.757              | 200      | 172             | 0.86        | 9.565.913                                  | 176      | 155             | 0.88        |
| MEDLINE precision (Fraser 2000)           | 6                 | 9.509.757              | 200      | 176             | 0.88        | 9.565.913                                  | 119      | 109             | 0.92        |
| MEDLINE precision (Fraser 2000)           | 7                 | 9.509.757              | 31       | 26              | 0.84        | 9.565.913                                  | 10       | 7               | 0.70        |
| MEDLINE precision (Fraser 2000)           | 8                 | 9.509.757              | 200      | 148             | 0.74        | 9.565.913                                  | 162      | 122             | 0.75        |
| MEDLINE precision (Fraser 2000)           | 9                 | 9.509.757              | 136      | 89              | 0.65        | 9.565.913                                  | 77       | 48              | 0.62        |
| MEDLINE precision (Fraser 2000)           | 10                | 9.509.757              | 200      | 145             | 0.73        | 9.565.913                                  | 195      | 145             | 0.74        |
| MEDLINE precision (Fraser 2000)           | 11                | 9.509.757              | 200      | 141             | 0.71        | 9.565.913                                  | 147      | 99              | 0.67        |
| MEDLINE precision (Fraser 2000)           | 12                | 9.509.757              | 179      | 144             | 0.80        | 9.565.913                                  | 85       | 67              | 0.79        |
| MEDLINE specificity (Fraser 2000)         | 1                 | 8.423.107              | 200      | 153             | 0.77        | 8.471.037                                  | 109      | 89              | 0.82        |
| MEDLINE specificity (Fraser 2000)         | 2                 | 8.423.107              | 200      | 162             | 0.81        | 8.471.037                                  | 155      | 126             | 0.81        |
| MEDLINE specificity (Fraser 2000)         | 3                 | 8.423.107              | 200      | 171             | 0.86        | 8.471.037                                  | 100      | 88              | 0.88        |
| MEDLINE specificity (Fraser 2000)         | 4                 | 8.423.107              | 106      | 84              | 0.79        | 8.471.037                                  | 51       | 39              | 0.76        |
| MEDLINE specificity (Fraser 2000)         | 5                 | 8.423.107              | 200      | 168             | 0.84        | 8.471.037                                  | 176      | 150             | 0.85        |
| MEDLINE specificity (Fraser 2000)         | 6                 | 8.423.107              | 200      | 170             | 0.85        | 8.471.037                                  | 119      | 105             | 0.88        |
| MEDLINE specificity (Fraser 2000)         | 7                 | 8.423.107              | 31       | 25              | 0.81        | 8.471.037                                  | 10       | 8               | 0.80        |
| MEDLINE specificity (Fraser 2000)         | 8                 | 8.423.107              | 200      | 105             | 0.53        | 8.471.037                                  | 162      | 86              | 0.53        |
| MEDLINE specificity (Fraser 2000)         | 9                 | 8.423.107              | 136      | 75              | 0.55        | 8.471.037                                  | 77       | 41              | 0.53        |
| MEDLINE specificity (Fraser 2000)         | 10                | 8.423.107              | 200      | 139             | 0.70        | 8.471.037                                  | 195      | 139             | 0.71        |
| MEDLINE specificity (Fraser 2000)         | 11                | 8.423.107              | 200      | 136             | 0.68        | 8.471.037                                  | 147      | 97              | 0.66        |
| MEDLINE specificity (Fraser 2000)         | 12                | 8.423.107              | 179      | 139             | 0.78        | 8.471.037                                  | 85       | 65              | 0.76        |
| Search terms for finding non-RCTs (Royle) | 1                 | 8.073.091              | 200      | 186             | 0.93        | 8.121.140                                  | 109      | 107             | 0.98        |
| Search terms for finding non-RCTs (Royle) | 2                 | 8.073.091              | 200      | 168             | 0.84        | 8.121.140                                  | 155      | 125             | 0.81        |
| Search terms for finding non-RCTs (Royle) | 3                 | 8.073.091              | 200      | 161             | 0.81        | 8.121.140                                  | 100      | 76              | 0.76        |

| Study filters (developers)                | All intervention types |               |          |                 |             | Subgroup analysis of specific intervention |          |                 |             |
|-------------------------------------------|------------------------|---------------|----------|-----------------|-------------|--------------------------------------------|----------|-----------------|-------------|
|                                           | Study type tested      | Hits Medline* | Test set | Citations found | Sensitivity | Hits Medline*                              | Test set | Citations found | Sensitivity |
| Search terms for finding non-RCTs (Royle) | 4                      | 8.073.091     | 106      | 77              | 0.73        | 8.121.140                                  | 51       | 39              | 0.76        |
| Search terms for finding non-RCTs (Royle) | 5                      | 8.073.091     | 200      | 171             | 0.86        | 8.121.140                                  | 176      | 152             | 0.86        |
| Search terms for finding non-RCTs (Royle) | 6                      | 8.073.091     | 200      | 175             | 0.88        | 8.121.140                                  | 119      | 103             | 0.87        |
| Search terms for finding non-RCTs (Royle) | 7                      | 8.073.091     | 31       | 27              | 0.87        | 8.121.140                                  | 10       | 8               | 0.80        |
| Search terms for finding non-RCTs (Royle) | 8                      | 8.073.091     | 200      | 196             | 0.98        | 8.121.140                                  | 162      | 161             | 0.99        |
| Search terms for finding non-RCTs (Royle) | 9                      | 8.073.091     | 136      | 78              | 0.57        | 8.121.140                                  | 77       | 48              | 0.62        |
| Search terms for finding non-RCTs (Royle) | 10                     | 8.073.091     | 200      | 143             | 0.72        | 8.121.140                                  | 195      | 143             | 0.73        |
| Search terms for finding non-RCTs (Royle) | 11                     | 8.073.091     | 200      | 148             | 0.74        | 8.121.140                                  | 147      | 114             | 0.78        |
| Search terms for finding non-RCTs (Royle) | 12                     | 8.073.091     | 179      | 82              | 0.46        | 8.121.140                                  | 85       | 40              | 0.47        |
| Fixed method A for MEDLINE (Furlan 2006)  | 1                      | 4.184.894     | 200      | 103             | 0.52        | 4.212.438                                  | 109      | 66              | 0.61        |
| Fixed method A for MEDLINE (Furlan 2006)  | 2                      | 4.184.894     | 200      | 125             | 0.63        | 4.212.438                                  | 155      | 100             | 0.65        |
| Fixed method A for MEDLINE (Furlan 2006)  | 3                      | 4.184.894     | 200      | 120             | 0.60        | 4.212.438                                  | 100      | 59              | 0.59        |
| Fixed method A for MEDLINE (Furlan 2006)  | 4                      | 4.184.894     | 106      | 56              | 0.53        | 4.212.438                                  | 51       | 30              | 0.59        |
| Fixed method A for MEDLINE (Furlan 2006)  | 5                      | 4.184.894     | 200      | 147             | 0.74        | 4.212.438                                  | 176      | 130             | 0.74        |
| Fixed method A for MEDLINE (Furlan 2006)  | 6                      | 4.184.894     | 200      | 152             | 0.76        | 4.212.438                                  | 119      | 88              | 0.74        |
| Fixed method A for MEDLINE (Furlan 2006)  | 7                      | 4.184.894     | 31       | 21              | 0.68        | 4.212.438                                  | 10       | 6               | 0.60        |
| Fixed method A for MEDLINE (Furlan 2006)  | 8                      | 4.184.894     | 200      | 165             | 0.83        | 4.212.438                                  | 162      | 136             | 0.84        |
| Fixed method A for MEDLINE (Furlan 2006)  | 9                      | 4.184.894     | 136      | 67              | 0.49        | 4.212.438                                  | 77       | 45              | 0.58        |
| Fixed method A for MEDLINE (Furlan 2006)  | 10                     | 4.184.894     | 200      | 117             | 0.59        | 4.212.438                                  | 195      | 117             | 0.60        |
| Fixed method A for MEDLINE (Furlan 2006)  | 11                     | 4.184.894     | 200      | 96              | 0.48        | 4.212.438                                  | 147      | 63              | 0.43        |
| Fixed method A for MEDLINE (Furlan 2006)  | 12                     | 4.184.894     | 179      | 73              | 0.41        | 4.212.438                                  | 85       | 36              | 0.42        |
| Fixed method B for MEDLINE (Furlan 2006)  | 1                      | 6.559.073     | 200      | 144             | 0.72        | 6.596.931                                  | 109      | 78              | 0.72        |
| Fixed method B for MEDLINE (Furlan 2006)  | 2                      | 6.559.073     | 200      | 140             | 0.70        | 6.596.931                                  | 155      | 105             | 0.68        |
| Fixed method B for MEDLINE (Furlan 2006)  | 3                      | 6.559.073     | 200      | 138             | 0.69        | 6.596.931                                  | 100      | 66              | 0.66        |
| Fixed method B for MEDLINE (Furlan 2006)  | 4                      | 6.559.073     | 106      | 63              | 0.59        | 6.596.931                                  | 51       | 25              | 0.49        |
| Fixed method B for MEDLINE (Furlan 2006)  | 5                      | 6.559.073     | 200      | 170             | 0.85        | 6.596.931                                  | 176      | 152             | 0.86        |
| Fixed method B for MEDLINE (Furlan 2006)  | 6                      | 6.559.073     | 200      | 168             | 0.84        | 6.596.931                                  | 119      | 99              | 0.83        |
| Fixed method B for MEDLINE (Furlan 2006)  | 7                      | 6.559.073     | 31       | 23              | 0.74        | 6.596.931                                  | 10       | 6               | 0.60        |

| Study filters (developers)               | All intervention types |               |          |                 |             | Subgroup analysis of specific intervention |          |                 |             |
|------------------------------------------|------------------------|---------------|----------|-----------------|-------------|--------------------------------------------|----------|-----------------|-------------|
|                                          | Study type tested      | Hits Medline* | Test set | Citations found | Sensitivity | Hits Medline*                              | Test set | Citations found | Sensitivity |
| Fixed method B for MEDLINE (Furlan 2006) | 8                      | 6.559.073     | 200      | 170             | 0.85        | 6.596.931                                  | 162      | 144             | 0.89        |
| Fixed method B for MEDLINE (Furlan 2006) | 9                      | 6.559.073     | 136      | 94              | 0.69        | 6.596.931                                  | 77       | 61              | 0.79        |
| Fixed method B for MEDLINE (Furlan 2006) | 10                     | 6.559.073     | 200      | 102             | 0.51        | 6.596.931                                  | 195      | 102             | 0.52        |
| Fixed method B for MEDLINE (Furlan 2006) | 11                     | 6.559.073     | 200      | 102             | 0.51        | 6.596.931                                  | 147      | 66              | 0.45        |
| Fixed method B for MEDLINE (Furlan 2006) | 12                     | 6.559.073     | 179      | 89              | 0.50        | 6.596.931                                  | 85       | 40              | 0.47        |
| MEDLINE cohort study strategy (BMJ)      | 1                      | 1.982.782     | 200      | 42              | 0.21        | 1.998.419                                  | 109      | 26              | 0.24        |
| MEDLINE cohort study strategy (BMJ)      | 2                      | 1.982.782     | 200      | 86              | 0.43        | 1.998.419                                  | 155      | 62              | 0.40        |
| MEDLINE cohort study strategy (BMJ)      | 3                      | 1.982.782     | 200      | 68              | 0.34        | 1.998.419                                  | 100      | 29              | 0.29        |
| MEDLINE cohort study strategy (BMJ)      | 4                      | 1.982.782     | 106      | 31              | 0.29        | 1.998.419                                  | 51       | 13              | 0.25        |
| MEDLINE cohort study strategy (BMJ)      | 5                      | 1.982.782     | 200      | 138             | 0.69        | 1.998.419                                  | 176      | 123             | 0.70        |
| MEDLINE cohort study strategy (BMJ)      | 6                      | 1.982.782     | 200      | 132             | 0.66        | 1.998.419                                  | 119      | 79              | 0.66        |
| MEDLINE cohort study strategy (BMJ)      | 7                      | 1.982.782     | 31       | 18              | 0.58        | 1.998.419                                  | 10       | 5               | 0.50        |
| MEDLINE cohort study strategy (BMJ)      | 8                      | 1.982.782     | 200      | 68              | 0.34        | 1.998.419                                  | 162      | 57              | 0.35        |
| MEDLINE cohort study strategy (BMJ)      | 9                      | 1.982.782     | 136      | 43              | 0.32        | 1.998.419                                  | 77       | 25              | 0.32        |
| MEDLINE cohort study strategy (BMJ)      | 10                     | 1.982.782     | 200      | 102             | 0.51        | 1.998.419                                  | 195      | 100             | 0.51        |
| MEDLINE cohort study strategy (BMJ)      | 11                     | 1.982.782     | 200      | 61              | 0.31        | 1.998.419                                  | 147      | 49              | 0.33        |
| MEDLINE cohort study strategy (BMJ)      | 12                     | 1.982.782     | 179      | 42              | 0.23        | 1.998.419                                  | 85       | 22              | 0.26        |
| Medline cohort and case-control strategy | 1                      | 2.430.887     | 200      | 53              | 0.27        | 2.449.516                                  | 109      | 33              | 0.30        |
| Medline cohort and case-control strategy | 2                      | 2.430.887     | 200      | 91              | 0.46        | 2.449.516                                  | 155      | 64              | 0.41        |
| Medline cohort and case-control strategy | 3                      | 2.430.887     | 200      | 74              | 0.37        | 2.449.516                                  | 100      | 31              | 0.31        |
| Medline cohort and case-control strategy | 4                      | 2.430.887     | 106      | 37              | 0.35        | 2.449.516                                  | 51       | 14              | 0.27        |
| Medline cohort and case-control strategy | 5                      | 2.430.887     | 200      | 143             | 0.72        | 2.449.516                                  | 176      | 128             | 0.73        |
| Medline cohort and case-control strategy | 6                      | 2.430.887     | 200      | 137             | 0.69        | 2.449.516                                  | 119      | 82              | 0.69        |
| Medline cohort and case-control strategy | 7                      | 2.430.887     | 31       | 19              | 0.61        | 2.449.516                                  | 10       | 6               | 0.60        |
| Medline cohort and case-control strategy | 8                      | 2.430.887     | 200      | 184             | 0.92        | 2.449.516                                  | 162      | 150             | 0.93        |
| Medline cohort and case-control strategy | 9                      | 2.430.887     | 136      | 46              | 0.34        | 2.449.516                                  | 77       | 27              | 0.35        |
| Medline cohort and case-control strategy | 10                     | 2.430.887     | 200      | 106             | 0.53        | 2.449.516                                  | 195      | 102             | 0.52        |
| Medline cohort and case-control strategy | 11                     | 2.430.887     | 200      | 63              | 0.32        | 2.449.516                                  | 147      | 50              | 0.34        |

| Study filters (developers)                     | All intervention types |               |          |                 |             | Subgroup analysis of specific intervention |          |                 |             |
|------------------------------------------------|------------------------|---------------|----------|-----------------|-------------|--------------------------------------------|----------|-----------------|-------------|
|                                                | Study type tested      | Hits Medline* | Test set | Citations found | Sensitivity | Hits Medline*                              | Test set | Citations found | Sensitivity |
| Medline cohort and case-control strategy (BMJ) | 12                     | 2.430.887     | 179      | 45              | 0.25        | 2.449.516                                  | 85       | 22              | 0.26        |
| MEDLINE cohort, case-control, and case         | 1                      | 2.517.309     | 200      | 54              | 0.27        | 2.536.354                                  | 109      | 33              | 0.30        |
| MEDLINE cohort, case-control, and case         | 2                      | 2.517.309     | 200      | 91              | 0.46        | 2.536.354                                  | 155      | 64              | 0.41        |
| MEDLINE cohort, case-control, and case         | 3                      | 2.517.309     | 200      | 74              | 0.37        | 2.536.354                                  | 100      | 31              | 0.31        |
| MEDLINE cohort, case-control, and case         | 4                      | 2.517.309     | 106      | 37              | 0.35        | 2.536.354                                  | 51       | 14              | 0.27        |
| MEDLINE cohort, case-control, and case         | 5                      | 2.517.309     | 200      | 143             | 0.72        | 2.536.354                                  | 176      | 128             | 0.73        |
| MEDLINE cohort, case-control, and case         | 6                      | 2.517.309     | 200      | 138             | 0.69        | 2.536.354                                  | 119      | 82              | 0.69        |
| MEDLINE cohort, case-control, and case         | 7                      | 2.517.309     | 31       | 19              | 0.61        | 2.536.354                                  | 10       | 6               | 0.60        |
| MEDLINE cohort, case-control, and case         | 8                      | 2.517.309     | 200      | 184             | 0.92        | 2.536.354                                  | 162      | 150             | 0.93        |
| MEDLINE cohort, case-control, and case         | 9                      | 2.517.309     | 136      | 47              | 0.35        | 2.536.354                                  | 77       | 27              | 0.35        |
| MEDLINE cohort, case-control, and case         | 10                     | 2.517.309     | 200      | 109             | 0.55        | 2.536.354                                  | 195      | 105             | 0.54        |
| MEDLINE cohort, case-control, and case         | 11                     | 2.517.309     | 200      | 63              | 0.32        | 2.536.354                                  | 147      | 50              | 0.34        |
| MEDLINE cohort, case-control, and case         | 12                     | 2.517.309     | 179      | 47              | 0.26        | 2.536.354                                  | 85       | 23              | 0.27        |
| MEDLINE cohort, case-control, case series,     | 1                      | 4.441.461     | 200      | 54              | 0.27        | 4.468.120                                  | 109      | 33              | 0.30        |
| MEDLINE cohort, case-control, case series,     | 2                      | 4.441.461     | 200      | 95              | 0.48        | 4.468.120                                  | 155      | 67              | 0.43        |
| MEDLINE cohort, case-control, case series,     | 3                      | 4.441.461     | 200      | 74              | 0.37        | 4.468.120                                  | 100      | 31              | 0.31        |
| MEDLINE cohort, case-control, case series,     | 4                      | 4.441.461     | 106      | 37              | 0.35        | 4.468.120                                  | 51       | 14              | 0.27        |
| MEDLINE cohort, case-control, case series,     | 5                      | 4.441.461     | 200      | 143             | 0.72        | 4.468.120                                  | 176      | 128             | 0.73        |
| MEDLINE cohort, case-control, case series,     | 6                      | 4.441.461     | 200      | 139             | 0.70        | 4.468.120                                  | 119      | 82              | 0.69        |
| MEDLINE cohort, case-control, case series,     | 7                      | 4.441.461     | 31       | 19              | 0.61        | 4.468.120                                  | 10       | 6               | 0.60        |
| MEDLINE cohort, case-control, case series,     | 8                      | 4.441.461     | 200      | 185             | 0.93        | 4.468.120                                  | 162      | 151             | 0.93        |
| MEDLINE cohort, case-control, case series,     | 9                      | 4.441.461     | 136      | 48              | 0.35        | 4.468.120                                  | 77       | 28              | 0.36        |
| MEDLINE cohort, case-control, case series,     | 10                     | 4.441.461     | 200      | 139             | 0.70        | 4.468.120                                  | 195      | 135             | 0.69        |
| MEDLINE cohort, case-control, case series,     | 11                     | 4.441.461     | 200      | 67              | 0.34        | 4.468.120                                  | 147      | 53              | 0.36        |
| MEDLINE cohort, case-control, case series,     | 12                     | 4.441.461     | 179      | 48              | 0.27        | 4.468.120                                  | 85       | 24              | 0.28        |
| Observational Studies – Medline (SIGN)         | 1                      | 2.492.125     | 200      | 37              | 0.19        | 2.510.531                                  | 109      | 24              | 0.22        |
| Observational Studies – Medline (SIGN)         | 2                      | 2.492.125     | 200      | 79              | 0.40        | 2.510.531                                  | 155      | 64              | 0.41        |

| Study filters (developers)             | All intervention types |               |          |                 |             | Subgroup analysis of specific intervention |          |                 |             |
|----------------------------------------|------------------------|---------------|----------|-----------------|-------------|--------------------------------------------|----------|-----------------|-------------|
|                                        | Study type tested      | Hits Medline* | Test set | Citations found | Sensitivity | Hits Medline*                              | Test set | Citations found | Sensitivity |
| Observational Studies – Medline (SIGN) | 3                      | 2.492.125     | 200      | 69              | 0.35        | 2.510.531                                  | 100      | 30              | 0.30        |
| Observational Studies – Medline (SIGN) | 4                      | 2.492.125     | 106      | 40              | 0.38        | 2.510.531                                  | 51       | 17              | 0.33        |
| Observational Studies – Medline (SIGN) | 5                      | 2.492.125     | 200      | 143             | 0.72        | 2.510.531                                  | 176      | 129             | 0.73        |
| Observational Studies – Medline (SIGN) | 6                      | 2.492.125     | 200      | 141             | 0.71        | 2.510.531                                  | 119      | 88              | 0.74        |
| Observational Studies – Medline (SIGN) | 7                      | 2.492.125     | 31       | 16              | 0.52        | 2.510.531                                  | 10       | 5               | 0.50        |
| Observational Studies – Medline (SIGN) | 8                      | 2.492.125     | 200      | 180             | 0.90        | 2.510.531                                  | 162      | 147             | 0.91        |
| Observational Studies – Medline (SIGN) | 9                      | 2.492.125     | 136      | 67              | 0.49        | 2.510.531                                  | 77       | 45              | 0.58        |
| Observational Studies – Medline (SIGN) | 10                     | 2.492.125     | 200      | 103             | 0.52        | 2.510.531                                  | 195      | 103             | 0.53        |
| Observational Studies – Medline (SIGN) | 11                     | 2.492.125     | 200      | 70              | 0.35        | 2.510.531                                  | 147      | 46              | 0.31        |
| Observational Studies – Medline (SIGN) | 12                     | 2.492.125     | 179      | 44              | 0.25        | 2.510.531                                  | 85       | 25              | 0.29        |
| Therapy Medline (Haynes 2005) – max.   | 1                      | 5.213.988     | 200      | 188             | 0.94        | 5.240.122                                  | 109      | 105             | 0.96        |
| Therapy Medline (Haynes 2005) – max.   | 2                      | 5.213.988     | 200      | 107             | 0.54        | 5.240.122                                  | 155      | 78              | 0.50        |
| Therapy Medline (Haynes 2005) – max.   | 3                      | 5.213.988     | 200      | 78              | 0.39        | 5.240.122                                  | 100      | 40              | 0.40        |
| Therapy Medline (Haynes 2005) – max.   | 4                      | 5.213.988     | 106      | 36              | 0.34        | 5.240.122                                  | 51       | 13              | 0.25        |
| Therapy Medline (Haynes 2005) – max.   | 5                      | 5.213.988     | 200      | 122             | 0.61        | 5.240.122                                  | 176      | 110             | 0.63        |
| Therapy Medline (Haynes 2005) – max.   | 6                      | 5.213.988     | 200      | 95              | 0.48        | 5.240.122                                  | 119      | 69              | 0.58        |
| Therapy Medline (Haynes 2005) – max.   | 7                      | 5.213.988     | 31       | 19              | 0.61        | 5.240.122                                  | 10       | 7               | 0.70        |
| Therapy Medline (Haynes 2005) – max.   | 8                      | 5.213.988     | 200      | 140             | 0.70        | 5.240.122                                  | 162      | 121             | 0.75        |
| Therapy Medline (Haynes 2005) – max.   | 9                      | 5.213.988     | 136      | 52              | 0.38        | 5.240.122                                  | 77       | 42              | 0.55        |
| Therapy Medline (Haynes 2005) – max.   | 10                     | 5.213.988     | 200      | 101             | 0.51        | 5.240.122                                  | 195      | 101             | 0.52        |
| Therapy Medline (Haynes 2005) – max.   | 11                     | 5.213.988     | 200      | 128             | 0.64        | 5.240.122                                  | 147      | 110             | 0.75        |
| Therapy Medline (Haynes 2005) – max.   | 12                     | 5.213.988     | 179      | 74              | 0.41        | 5.240.122                                  | 85       | 43              | 0.51        |
| Therapy Medline (Haynes 2005) – max.   | 1                      | 485.918       | 200      | 170             | 0.85        | 488.896                                    | 109      | 96              | 0.88        |
| Therapy Medline (Haynes 2005) – max.   | 2                      | 485.918       | 200      | 25              | 0.13        | 488.896                                    | 155      | 17              | 0.11        |
| Therapy Medline (Haynes 2005) – max.   | 3                      | 485.918       | 200      | 10              | 0.05        | 488.896                                    | 100      | 7               | 0.07        |
| Therapy Medline (Haynes 2005) – max.   | 4                      | 485.918       | 106      | 1               | 0.01        | 488.896                                    | 51       | 0               | 0.00        |
| Therapy Medline (Haynes 2005) – max.   | 5                      | 485.918       | 200      | 19              | 0.10        | 488.896                                    | 176      | 19              | 0.11        |
| Therapy Medline (Haynes 2005) – max.   | 6                      | 485.918       | 200      | 2               | 0.01        | 488.896                                    | 119      | 0               | 0.00        |



| Study filters (developers)           | All intervention types |               |          |                 |             | Subgroup analysis of specific intervention |          |                 |             |
|--------------------------------------|------------------------|---------------|----------|-----------------|-------------|--------------------------------------------|----------|-----------------|-------------|
|                                      | Study type tested      | Hits Medline* | Test set | Citations found | Sensitivity | Hits Medline*                              | Test set | Citations found | Sensitivity |
| Therapy Medline (Haynes 2005) – max. | 7                      | 485.918       | 31       | 1               | 0.03        | 488.896                                    | 10       | 0               | 0.00        |
| Therapy Medline (Haynes 2005) – max. | 8                      | 485.918       | 200      | 2               | 0.01        | 488.896                                    | 162      | 2               | 0.01        |
| Therapy Medline (Haynes 2005) – max. | 9                      | 485.918       | 136      | 0               | 0.00        | 488.896                                    | 77       | 0               | 0.00        |
| Therapy Medline (Haynes 2005) – max. | 10                     | 485.918       | 200      | 1               | 0.01        | 488.896                                    | 195      | 1               | 0.01        |
| Therapy Medline (Haynes 2005) – max. | 11                     | 485.918       | 200      | 5               | 0.03        | 488.896                                    | 147      | 3               | 0.02        |
| Therapy Medline (Haynes 2005) – max. | 12                     | 485.918       | 179      | 2               | 0.01        | 488.896                                    | 85       | 2               | 0.02        |
| Therapy Medline (Haynes 2005) –      | 1                      | 796.127       | 200      | 174             | 0.87        | 800.747                                    | 109      | 97              | 0.89        |
| Therapy Medline (Haynes 2005) –      | 2                      | 796.127       | 200      | 31              | 0.16        | 800.747                                    | 155      | 22              | 0.14        |
| Therapy Medline (Haynes 2005) –      | 3                      | 796.127       | 200      | 13              | 0.07        | 800.747                                    | 100      | 8               | 0.08        |
| Therapy Medline (Haynes 2005) –      | 4                      | 796.127       | 106      | 1               | 0.01        | 800.747                                    | 51       | 0               | 0.00        |
| Therapy Medline (Haynes 2005) –      | 5                      | 796.127       | 200      | 24              | 0.12        | 800.747                                    | 176      | 23              | 0.13        |
| Therapy Medline (Haynes 2005) –      | 6                      | 796.127       | 200      | 6               | 0.03        | 800.747                                    | 119      | 4               | 0.03        |
| Therapy Medline (Haynes 2005) –      | 7                      | 796.127       | 31       | 3               | 0.10        | 800.747                                    | 10       | 1               | 0.10        |
| Therapy Medline (Haynes 2005) –      | 8                      | 796.127       | 200      | 3               | 0.02        | 800.747                                    | 162      | 2               | 0.01        |
| Therapy Medline (Haynes 2005) –      | 9                      | 796.127       | 136      | 0               | 0.00        | 800.747                                    | 77       | 0               | 0.00        |
| Therapy Medline (Haynes 2005) –      | 10                     | 796.127       | 200      | 6               | 0.03        | 800.747                                    | 195      | 6               | 0.03        |
| Therapy Medline (Haynes 2005) –      | 11                     | 796.127       | 200      | 9               | 0.05        | 800.747                                    | 147      | 7               | 0.05        |
| Therapy Medline (Haynes 2005) –      | 12                     | 796.127       | 179      | 10              | 0.06        | 800.747                                    | 85       | 10              | 0.12        |
| Cochrane Search Strategy (2008) –    | 1                      | 3.581.596     | 200      | 185             | 0.93        | 3.601.842                                  | 109      | 103             | 0.94        |
| Cochrane Search Strategy (2008) –    | 2                      | 3.581.596     | 200      | 114             | 0.57        | 3.601.842                                  | 155      | 75              | 0.48        |
| Cochrane Search Strategy (2008) –    | 3                      | 3.581.596     | 200      | 83              | 0.42        | 3.601.842                                  | 100      | 42              | 0.42        |
| Cochrane Search Strategy (2008) –    | 4                      | 3.581.596     | 106      | 32              | 0.30        | 3.601.842                                  | 51       | 10              | 0.20        |
| Cochrane Search Strategy (2008) –    | 5                      | 3.581.596     | 200      | 105             | 0.53        | 3.601.842                                  | 176      | 95              | 0.54        |
| Cochrane Search Strategy (2008) –    | 6                      | 3.581.596     | 200      | 84              | 0.42        | 3.601.842                                  | 119      | 57              | 0.48        |
| Cochrane Search Strategy (2008) –    | 7                      | 3.581.596     | 31       | 18              | 0.58        | 3.601.842                                  | 10       | 6               | 0.60        |
| Cochrane Search Strategy (2008) –    | 8                      | 3.581.596     | 200      | 57              | 0.29        | 3.601.842                                  | 162      | 53              | 0.33        |
| Cochrane Search Strategy (2008) –    | 9                      | 3.581.596     | 136      | 27              | 0.20        | 3.601.842                                  | 77       | 16              | 0.21        |
| Cochrane Search Strategy (2008) –    | 10                     | 3.581.596     | 200      | 68              | 0.34        | 3.601.842                                  | 195      | 68              | 0.35        |



| Study filters (developers)        | Study type tested | All intervention types |          |                 |             | Subgroup analysis of specific intervention |          |                 |             |
|-----------------------------------|-------------------|------------------------|----------|-----------------|-------------|--------------------------------------------|----------|-----------------|-------------|
|                                   |                   | Hits Medline*          | Test set | Citations found | Sensitivity | Hits Medline*                              | Test set | Citations found | Sensitivity |
| Cochrane Search Strategy (2008) – | 11                | 3.581.596              | 200      | 90              | 0.45        | 3.601.842                                  | 147      | 75              | 0.51        |
| Cochrane Search Strategy (2008) – | 12                | 3.581.596              | 179      | 43              | 0.24        | 3.601.842                                  | 85       | 21              | 0.25        |
| Cochrane Search Strategy (2008) – | 1                 | 1.057.717              | 200      | 181             | 0.91        | 1.064.405                                  | 109      | 101             | 0.93        |
| Cochrane Search Strategy (2008) – | 2                 | 1.057.717              | 200      | 73              | 0.37        | 1.064.405                                  | 155      | 46              | 0.30        |
| Cochrane Search Strategy (2008) – | 3                 | 1.057.717              | 200      | 48              | 0.24        | 1.064.405                                  | 100      | 26              | 0.26        |
| Cochrane Search Strategy (2008) – | 4                 | 1.057.717              | 106      | 13              | 0.12        | 1.064.405                                  | 51       | 5               | 0.10        |
| Cochrane Search Strategy (2008) – | 5                 | 1.057.717              | 200      | 32              | 0.16        | 1.064.405                                  | 176      | 29              | 0.16        |
| Cochrane Search Strategy (2008) – | 6                 | 1.057.717              | 200      | 6               | 0.03        | 1.064.405                                  | 119      | 4               | 0.03        |
| Cochrane Search Strategy (2008) – | 7                 | 1.057.717              | 31       | 6               | 0.19        | 1.064.405                                  | 10       | 3               | 0.30        |
| Cochrane Search Strategy (2008) – | 8                 | 1.057.717              | 200      | 23              | 0.12        | 1.064.405                                  | 162      | 20              | 0.12        |
| Cochrane Search Strategy (2008) – | 9                 | 1.057.717              | 136      | 6               | 0.04        | 1.064.405                                  | 77       | 5               | 0.06        |
| Cochrane Search Strategy (2008) – | 10                | 1.057.717              | 200      | 12              | 0.06        | 1.064.405                                  | 195      | 12              | 0.06        |
| Cochrane Search Strategy (2008) – | 11                | 1.057.717              | 200      | 32              | 0.16        | 1.064.405                                  | 147      | 27              | 0.18        |
| Cochrane Search Strategy (2008) – | 12                | 1.057.717              | 179      | 16              | 0.09        | 1.064.405                                  | 85       | 14              | 0.16        |

Study filters for non-randomized studies of interventions consistently lacked sensitivity upon external validation

---
