# Supplementary material for: Study filters for non-randomized studies of interventions consistently lacked sensitivity upon external validation
Source: Springer Nature journal article supplement (doi:10.1186/s12874-018-0625-4), 2018-12-01
Supplement: MOESM6 [file 16350316]

## Detailed results of the evaluation of study filters: only one PMID per study

The evaluation with all intervention types was performed between 19.-21.06.2017. The evaluation with the subgroup “only one PMID per study” was performed on 16.11.2017. Study types: 1: randomized controlled trial (RCT), 2: nonrandomized controlled trial, 3: controlled before-after study, 4: interrupted time series (with comparison group), 5: prospective cohort study

| Filter abbreviation                                | Study type tested | All intervention types |          |                 |             | Only 1 PMID per study |          |                 |             |
|----------------------------------------------------|-------------------|------------------------|----------|-----------------|-------------|-----------------------|----------|-----------------|-------------|
|                                                    |                   | Hits in Medline*       | Test set | Citations found | Sensitivity | Hits in Medline*      | Test set | Citations found | Sensitivity |
| Clinical trials (University of Texas)              | 1                 | 1.445.276              | 200      | 182             | 0.91        | 1.559.746             | 126      | 119             | 0.94        |
| Clinical trials (University of Texas)              | 2                 | 1.445.276              | 200      | 77              | 0.39        | 1.559.746             | 82       | 41              | 0.50        |
| Clinical trials (University of Texas)              | 3                 | 1.445.276              | 200      | 47              | 0.24        | 1.559.746             | 124      | 33              | 0.27        |
| Clinical trials (University of Texas)              | 4                 | 1.445.276              | 106      | 8               | 0.08        | 1.559.746             | 54       | 5               | 0.09        |
| Clinical trials (University of Texas)              | 5                 | 1.445.276              | 200      | 69              | 0.35        | 1.559.746             | 143      | 41              | 0.29        |
| Search terms for finding non-RCTs (Royle 2003)     | 1                 | 8.073.091              | 200      | 186             | 0.93        | 8.707.360             | 126      | 121             | 0.96        |
| Search terms for finding non-RCTs (Royle 2003)     | 2                 | 8.073.091              | 200      | 168             | 0.84        | 8.707.360             | 82       | 73              | 0.89        |
| Search terms for finding non-RCTs (Royle 2003)     | 3                 | 8.073.091              | 200      | 161             | 0.81        | 8.707.360             | 124      | 106             | 0.85        |
| Search terms for finding non-RCTs (Royle 2003)     | 4                 | 8.073.091              | 106      | 77              | 0.73        | 8.707.360             | 54       | 38              | 0.70        |
| Search terms for finding non-RCTs (Royle 2003)     | 5                 | 8.073.091              | 200      | 171             | 0.86        | 8.707.360             | 143      | 124             | 0.87        |
| Cochrane_RCTs_Sens                                 | 1                 | 3.581.596              | 200      | 185             | 0.93        | 3.844.364             | 126      | 120             | 0.95        |
| Cochrane Search Strategy (2008) – sensitivity-max. | 2                 | 3.581.596              | 200      | 114             | 0.57        | 3.844.364             | 82       | 59              | 0.72        |
| Cochrane Search Strategy (2008) – sensitivity-max. | 3                 | 3.581.596              | 200      | 83              | 0.42        | 3.844.364             | 124      | 54              | 0.44        |
| Cochrane Search Strategy (2008) – sensitivity-max. | 4                 | 3.581.596              | 106      | 32              | 0.3         | 3.844.364             | 54       | 18              | 0.33        |

Study filters for non-randomized studies of interventions consistently lacked sensitivity upon external validation

---

|                                                                     |   |           |     |     |      |           |     |     |      |
|---------------------------------------------------------------------|---|-----------|-----|-----|------|-----------|-----|-----|------|
| Cochrane Search Strategy (2008)<br>– sensitivity-max.               | 5 | 3.581.596 | 200 | 105 | 0.53 | 3.844.364 | 143 | 72  | 0.50 |
| Cochrane Search Strategy (2008)<br>– sensitivity and precision-max. | 1 | 1.057.717 | 200 | 181 | 0.91 | 1.135.996 | 126 | 119 | 0.94 |
| Cochrane Search Strategy (2008)<br>– sensitivity and precision-max. | 2 | 1.057.717 | 200 | 73  | 0.37 | 1.135.996 | 82  | 42  | 0.51 |
| Cochrane Search Strategy (2008)<br>– sensitivity and precision-max. | 3 | 1.057.717 | 200 | 48  | 0.24 | 1.135.996 | 124 | 29  | 0.23 |
| Cochrane Search Strategy (2008)<br>– sensitivity and precision-max. | 4 | 1.057.717 | 106 | 13  | 0.12 | 1.135.996 | 54  | 6   | 0.11 |
| Cochrane Search Strategy (2008)<br>– sensitivity and precision-max. | 5 | 1.057.717 | 200 | 32  | 0.16 | 1.135.996 | 143 | 16  | 0.11 |
